# Supplementary material for: Diabetes is not a risk factor for myocardial infarction in patients without coronary artery disease: A study from the Western Denmark Heart Registry
Source: PubMed Central journal article supplement — Diab Vasc Dis Res. 2020 Jul 28;17(4):1479164120941809. doi: 10.1177/1479164120941809 (PMC7510365; doi:10.1177/1479164120941809), 2020-07-28
Supplement: Supplemental_Material.pdf [file Supplemental_Material.pdf]

## Supplemental Material

**Table S1. Anatomical Therapeutic Chemical (ATC) codes used in the Danish Prescription Registry**

| <i>Medication</i>                              | <i>Anatomical Therapeutic Chemical (ATC) code</i>                             |
|------------------------------------------------|-------------------------------------------------------------------------------|
| Insulin                                        | A10A*                                                                         |
| Metformin                                      | A10BA, A10BD03, A10BD07, A10BD08, A10BD10, A10BD11, A10BD13, A10BD15, A10BD20 |
| Sulfonylurea                                   | A10BB, A10BD04                                                                |
| Glucagon-like peptide-1 analogue               | A10BJ                                                                         |
| Dipeptidyl peptidase-4 inhibitor               | A10BH, A10BD07, A10BD08, A10BD10, A10BD11, A10BD13                            |
| Glitazone                                      | A10BG, A10BD03, A10BD04                                                       |
| Statin                                         | C10AA*                                                                        |
| $\beta$ -blocker                               | C07*                                                                          |
| Angiotensin-converting enzyme inhibitor        | C09A*, C09B*                                                                  |
| Angiotensin II receptor blocker                | C09C*, C09D*                                                                  |
| Calcium channel blocker                        | C08C*, C08D*                                                                  |
| Thiazide                                       | C03AA*, C03AB*                                                                |
| Aspirin                                        | B01AC22, N02BA01                                                              |
| Adenosine diphosphate receptor inhibitor       | B01AC04, B01AC22, B01AC24                                                     |
| Vitamin K antagonist (Warfarin, Phenprocoumon) | B01AA03, B01AA04                                                              |
| Non-vitamin K oral anticoagulant               | B01AF02, B01AE07, B01AF01                                                     |

\*Including underlying anatomical therapeutic chemical codes

**Table S2. Diagnosis codes used in the Danish National Patient Registry**

| <b>The Danish National Patient Registry</b> |                                                                                                                                                          |                                                                                                                               |                                                          |
|---------------------------------------------|----------------------------------------------------------------------------------------------------------------------------------------------------------|-------------------------------------------------------------------------------------------------------------------------------|----------------------------------------------------------|
| <i>Diagnosis</i>                            | <i>ICD-8 code</i>                                                                                                                                        | <i>ICD-10 code</i>                                                                                                            | <i>Algorithm</i>                                         |
| Myocardial infarction                       |                                                                                                                                                          | DI21*                                                                                                                         | Primary or secondary diagnosis during a hospital contact |
| Haemorrhagic stroke                         |                                                                                                                                                          | DI60*, DI61*, DS06.6                                                                                                          | Primary or secondary diagnosis during a hospital contact |
| Ischemic stroke                             |                                                                                                                                                          | DI63*, DI64*                                                                                                                  | Primary or secondary diagnosis during a hospital contact |
| Transient ischemic attack                   |                                                                                                                                                          | DG45*                                                                                                                         | Primary or secondary diagnosis during a hospital contact |
| Systemic embolism                           |                                                                                                                                                          | DI74*                                                                                                                         | Primary or secondary diagnosis during a hospital contact |
| Atrial fibrillation                         |                                                                                                                                                          | DI48*                                                                                                                         | Inpatient or outpatient hospital diagnosis               |
| Diabetes                                    |                                                                                                                                                          | DE10*-DE14*, DH36.0, DO24.0-24.3, DO24.5-24.9                                                                                 | Inpatient or outpatient hospital diagnosis               |
| Hypertension                                |                                                                                                                                                          | DI10*, DI15.1, DI15.8, DI15.9                                                                                                 | Inpatient or outpatient hospital diagnosis               |
| Heart failure                               |                                                                                                                                                          | DI11.0, DI13.0, DI13.2, DI42.0, DI50*                                                                                         | Inpatient or outpatient hospital diagnosis               |
| Peripheral artery disease                   |                                                                                                                                                          | DI70, DI70.1-DI70.9, DI73.9*                                                                                                  | Inpatient or outpatient hospital diagnosis               |
| <b>Surgery</b>                              |                                                                                                                                                          |                                                                                                                               |                                                          |
| PCI                                         | 30350, 30354, 30359                                                                                                                                      | KFNG02*, KFNG05*, KFNG96                                                                                                      | Procedure codes                                          |
| CABG                                        | 30009, 30019, 30029, 30039, 30049, 30059, 30069, 30079, 30089, 30099, 30109, 30119, 30120, 30129, 30139, 30149, 30159, 30169, 30179, 30189, 30199, 30200 | KFNA*-KFNE*                                                                                                                   | Procedure codes                                          |
| Carotid thrombectomy                        |                                                                                                                                                          | KPAE25*, KPAF20*-KPAF22*                                                                                                      | Procedure codes                                          |
| Peripheral revascularization                |                                                                                                                                                          | KPBE*-KPDF*, KPBH*, KPBF*, KPBF* (upper limb), KPDE*-KPDF*, KPDH*, KPDQ* (a. ilaca), KPEE*-KPEF*, KPEH*, KPEQ* (a. femoralis) | Procedure codes                                          |

|                       |                                                                                                       |                 |
|-----------------------|-------------------------------------------------------------------------------------------------------|-----------------|
| Lower limb amputation | KPFE*-KPPF*, KPFH*, KPFQ* (a. poplitea/crus/foot) KPDU74*, KPDU84* (iliac-bypass) KNFQ*, KNGQ*, KNHQ* | Procedure codes |
|-----------------------|-------------------------------------------------------------------------------------------------------|-----------------|

### Charlson Comorbidity Index

|                                       |                                                                |                                                                                           |                                            |
|---------------------------------------|----------------------------------------------------------------|-------------------------------------------------------------------------------------------|--------------------------------------------|
| Myocardial infarction                 | 410*                                                           | DI21*, DI22*, DI23*                                                                       | Inpatient or outpatient hospital diagnosis |
| Heart failure                         | 427.09, 427.10, 427.11, 427.19, 428.99, 782.49                 | DI11.0, DI13.0, DI13.2, DI50,                                                             | Inpatient or outpatient hospital diagnosis |
| Peripheral artery disease             | 440*-445*                                                      | DI70*-DI74*, DI77*                                                                        | Inpatient or outpatient hospital diagnosis |
| Coronary artery disease               | 430*-438*                                                      | DI60*-DI69*, DG45*, DG46*                                                                 | Inpatient or outpatient hospital diagnosis |
| Dementia                              | 290.09-290.19, 293.09                                          | DF00*-DF03*, DF05.1, DG30*                                                                | Inpatient or outpatient hospital diagnosis |
| Chronic obstructive pulmonary disease | 490*-493*, 515*-518*                                           | DJ40*-DJ47*, DJ60*-DJ67*, DJ68.4, DJ70.1, DJ70.3, *DJ84.1, DJ92.0, DJ96.1, DJ98.2, DJ98.3 | Inpatient or outpatient hospital diagnosis |
| Connective tissue disease             | 712*, 716*, 734*, 446*, 135.99                                 | DM05*, DM06*, DM08*, DM09*, DM30*-DM36*, DD86*                                            | Inpatient or outpatient hospital diagnosis |
| Peptic ulcer                          | 530.91, 530.98, 531*-534*                                      | DK22.1, DK25*-DK28*                                                                       | Inpatient or outpatient hospital diagnosis |
| Mild liver disease                    | 571*, 573.01, 573.04                                           | DB18*, DK70.0-DK70.3, DK70.9, DK71*, DK73*, DK74*, DK76.0                                 | Inpatient or outpatient hospital diagnosis |
| Diabetes, type I and II               | 249.00, 249.06, 249.07, 249.09, 250.00, 250.06, 250.07, 250.09 | DE10.0, DE10.1, DE10.9, DE11.0, DE11.1, DE11.9                                            | Inpatient or outpatient hospital diagnosis |
| Hemiplegia                            | 334*                                                           | DG81*, DG82*                                                                              | Inpatient or outpatient hospital diagnosis |
| Moderate/severe kidney disease        | 403*, 404*, 580*-584*, 590.09, 593.19, 753.10-753.19, 792*     | DI12*, DI13*, DN00*-DN05*, DN07*, DN11*, DN14*, DN17*-DN19*, DQ61*                        | Inpatient or outpatient hospital diagnosis |
| Diabetes with organ failure           | 249.01-249.05, 249.08, 250.01-250.05, 250.08                   | DE10.2-DE10.8, DE11.2-DE11.8                                                              | Inpatient or outpatient hospital diagnosis |
| Tumor                                 | 140*-194*                                                      | DC00*-DC75*                                                                               | Inpatient or outpatient hospital diagnosis |
| Leukemia                              | 204*-207*                                                      | DC91*-DC95*                                                                               | Inpatient or outpatient hospital diagnosis |
| Lymphoma                              | 200*-203*, 275.59                                              | DC81*-DC85*, DC88*, DC90*, DC96*                                                          | Inpatient or outpatient hospital diagnosis |
| Moderate/severe liver disease         | 070.00, 070.02, 070.04, 070.06,                                | DB15.0, DB16.0, DB16.2, DB19.0,                                                           | Inpatient or outpatient hospital diagnosis |

|                                                 |                                               |                                                |                                               |
|-------------------------------------------------|-----------------------------------------------|------------------------------------------------|-----------------------------------------------|
| Metastatic disease                              | 070.08, 573.00,<br>456.00-456.09<br>195*-199* | DK70.4, DK72*, DK76.6,<br>DI85*<br>DC76*-DC80* | Inpatient or outpatient<br>hospital diagnosis |
| Acquired<br>immunodeficiency<br>syndrome (AIDS) | 079.83                                        | DB21*-DB24                                     | Inpatient or outpatient<br>hospital diagnosis |

\*Including underlying diagnosis and procedure codes

**Table S3. Diagnosis codes defining cardiac death**

|                                         | <i>Diagnosis codes</i> |
|-----------------------------------------|------------------------|
| Cardiac death                           |                        |
| Ischemic heart disease                  | I20*-I25*              |
| Cardiac arrest with unspecified cause   | I46*                   |
| Ventricular tachycardia                 | I47.2                  |
| Other specified cardiac arrhythmias     | I49*                   |
| Heart failure                           | I50*                   |
| Sudden death with unspecified cause     | R96, R999              |
| Unattended death with unspecified cause | R989                   |

\*Including underlying diagnosis codes

**Table S4. Number of events and risk of myocardial infarction, cardiac death, all-cause death, and coronary revascularization in patients with type 1 diabetes stratified by presence/absence of coronary artery disease**

|                                                                                 | Events<br>(n) | Rate per 100 person-<br>years (95% CI) | CIP <sup>1</sup><br>(95% CI) | Risk difference <sup>1</sup><br>(95% CI) | Unadjusted HR<br>(95% CI)  | Adjusted HR <sup>2</sup><br>(95% CI)  |
|---------------------------------------------------------------------------------|---------------|----------------------------------------|------------------------------|------------------------------------------|----------------------------|---------------------------------------|
| <i>Myocardial infarction</i>                                                    |               |                                        |                              |                                          |                            |                                       |
| -CAD -DM (reference)                                                            | 795           | 0.24 (0.22-0.25)                       | 2.55% (2.39-2.74)            | reference                                | 1                          | 1                                     |
| -CAD +DM                                                                        | 13            | 0.32 (0.19-0.56)                       | 3.49% (1.96-5.73)            | 0.94 (-0.93-2.81)                        | 1.36 (0.79-2.37)           | 1.34 (0.77-2.33)                      |
| +CAD +DM                                                                        | 137           | 1.56 (1.32-1.85)                       | 15.45% (13.16-17.91)         | 12.89 (10.51-15.27)                      | 6.57 (5.48-7.88)           | 3.97 (3.24-4.86)                      |
| <i>Cardiac death</i>                                                            |               |                                        |                              |                                          |                            |                                       |
| -CAD -DM (reference)                                                            | 689           | 0.26 (0.24-0.28)                       | 2.51% (2.32-2.70)            | reference                                | 1                          | 1                                     |
| -CAD +DM                                                                        | 7             | 0.24 (0.11-0.49)                       | 2.24% (0.96-4.46)            | 0.27 (-1.99-1.45)                        | 0.91 (0.43-1.92)           | 1.31 (0.62-2.76)                      |
| +CAD +DM                                                                        | 91            | 1.46 (1.19-1.80)                       | 11.78% (9.55-14.25)          | 9.27 (6.91-11.63)                        | 5.65 (4.54-7.03)           | 4.36 (3.42-5.55)                      |
| <i>All-cause death</i>                                                          |               |                                        |                              |                                          |                            |                                       |
| -CAD -DM (reference)                                                            | 6,129         | 2.29 (2.23-2.35)                       | 22.80% (22.28-23.33)         | reference                                | 1                          | 1                                     |
| -CAD +DM                                                                        | 115           | 3.87 (3.22-4.65)                       | 36.28% (30.92-42.26)         | 13.48 (7.77-19.19)                       | 1.70 (1.41-2.04)           | 2.44 (2.03-2.95)                      |
| +CAD +DM                                                                        | 413           | 6.64 (6.03-7.31)                       | 52.15% (48.47-55.92)         | 29.35 (25.59-33.11)                      | 2.92 (2.65-3.23)           | 2.91 (2.61-3.24)                      |
|                                                                                 |               |                                        |                              |                                          | Unadjusted IRR<br>(95% CI) | Adjusted IRR <sup>2</sup><br>(95% CI) |
| <i>Coronary revascularization &gt; 90 days after index coronary angiography</i> |               |                                        |                              |                                          |                            |                                       |
| -CAD -DM (reference)                                                            | 730           | 0.22 (0.20-0.23)                       | 2.35% (2.18-2.52)            | reference                                | 1                          | 1                                     |
| -CAD +DM                                                                        | 24            | 0.61 (0.41-0.90)                       | 6.45% (4.26-9.26)            | 4.10 (1.61-6.59)                         | 2.80 (1.87-4.21)           | 2.31 (1.53-3.48)                      |
| +CAD +DM                                                                        | 196           | 2.38 (2.07-2.74)                       | 22.10% (19.43-24.88)         | 19.75 (17.02-22.48)                      | 11.04 (9.37-13.01)         | 4.83 (3.49-6.69)                      |

<sup>1</sup>Maximum follow-up of 11 years.

<sup>2</sup>Adjusted for age, hypertension, active smoking, previous ischemic stroke, peripheral artery disease, procedural priority, year of index coronary angiography, statin treatment, oral anticoagulant treatment, and antiplatelet treatment, using patients without CAD and without DM as reference. IRR was further adjusted for coronary revascularization < 90 days after the index coronary angiography.

Abbreviations: CAD, coronary artery disease; CI, confidence interval; CIP, cumulated incidence proportion; DM, diabetes mellitus; HR, hazard ratio; IRR, incidence rate ratio.

**Table S5. Number of events and risk of myocardial infarction, cardiac death, all-cause death, and coronary revascularization in patients with type 2 diabetes stratified by presence/absence of coronary artery disease**

|                                                                                 | Events<br>(n) | Rate per 100 person-<br>years (95% CI) | CIP <sup>1</sup><br>(95% CI) | Risk difference <sup>1</sup><br>(95% CI) | Unadjusted HR<br>(95% CI)  | Adjusted HR <sup>2</sup><br>(95% CI)  |
|---------------------------------------------------------------------------------|---------------|----------------------------------------|------------------------------|------------------------------------------|----------------------------|---------------------------------------|
| <i>Myocardial infarction</i>                                                    |               |                                        |                              |                                          |                            |                                       |
| -CAD -DM (reference)                                                            | 795           | 0.24 (0.22-0.25)                       | 2.55% (2.39-2.74)            | reference                                | 1                          | 1                                     |
| -CAD +DM                                                                        | 115           | 0.29 (0.24-0.35)                       | 3.11% (2.59-3.71)            | 0.55 (-0.05-1.15)                        | 1.22 (1.00-1.48)           | 1.18 (0.97-1.44)                      |
| +CAD +DM                                                                        | 919           | 1.18 (1.10-1.26)                       | 11.95% (11.23-12.68)         | 9.39 (8.66-10.12)                        | 4.93 (4.48-5.42)           | 3.68 (3.31-4.09)                      |
| <i>Cardiac death</i>                                                            |               |                                        |                              |                                          |                            |                                       |
| -CAD -DM (reference)                                                            | 689           | 0.26 (0.24-0.28)                       | 2.51% (2.32-2.70)            | reference                                | 1                          | 1                                     |
| -CAD +DM                                                                        | 119           | 0.40 (0.34-0.48)                       | 3.71% (3.06-4.43)            | 1.19 (0.48-1.90)                         | 1.57 (1.29-1.91)           | 1.67 (1.37-2.03)                      |
| +CAD +DM                                                                        | 781           | 1.40 (1.30-1.50)                       | 11.54% (10.76-12.35)         | 9.03 (8.25-9.81)                         | 5.40 (4.87-5.98)           | 4.05 (3.61-4.54)                      |
| <i>All-cause death</i>                                                          |               |                                        |                              |                                          |                            |                                       |
| -CAD -DM (reference)                                                            | 6,129         | 2.29 (2.23-2.35)                       | 22.80% (22.28-23.33)         | reference                                | 1                          | 1                                     |
| -CAD +DM                                                                        | 1,002         | 3.41 (3.20-3.62)                       | 32.23% (30.49-34.04)         | 9.43 (7.57-11.29)                        | 1.50 (1.41-1.61)           | 1.61 (1.51-1.72)                      |
| +CAD +DM                                                                        | 3,196         | 5.72 (5.53-5.92)                       | 48.80% (47.48-50.15)         | 26.00 (24.67-27.33)                      | 2.54 (2.44-2.65)           | 2.07 (1.98-2.18)                      |
|                                                                                 |               |                                        |                              |                                          | Unadjusted IRR<br>(95% CI) | Adjusted IRR <sup>2</sup><br>(95% CI) |
| <i>Coronary revascularization &gt; 90 days after index coronary angiography</i> |               |                                        |                              |                                          |                            |                                       |
| -CAD -DM (reference)                                                            | 730           | 0.22 (0.20-0.23)                       | 2.35% (2.18-2.52)            | reference                                | 1                          | 1                                     |
| -CAD +DM                                                                        | 112           | 0.28 (0.23-0.34)                       | 3.03% (2.51-3.62)            | 0.68 (0.11-1.25)                         | 1.30 (1.06-1.58)           | 1.20 (0.98-1.47)                      |
| +CAD +DM                                                                        | 1,439         | 1.96 (1.87-2.07)                       | 18.70% (17.83-19.57)         | 16.35 (15.48-17.21)                      | 9.10 (8.31-9.96)           | 7.62 (6.85-8.48)                      |

<sup>1</sup>Maximum follow-up of 11 years.

<sup>2</sup>Adjusted for age, hypertension, active smoking, previous ischemic stroke, peripheral artery disease, procedural priority, year of index coronary angiography, statin treatment, oral anticoagulant treatment, and antiplatelet treatment, using patients without CAD and without DM as reference. IRR was further adjusted for coronary revascularization < 90 days after the index coronary angiography.

Abbreviations: CAD, coronary artery disease; CI, confidence interval; CIP, cumulated incidence proportion; DM, diabetes mellitus; HR, hazard ratio; IRR, incidence rate ratio.

**Table S6. Number of events and risk of myocardial infarction, cardiac death, all-cause death, and coronary revascularization in male patients with and without diabetes stratified by coronary artery disease**

|                                                                                 | Events<br>(n) | Rate per 100 person-<br>years (95% CI) | CIP <sup>1</sup><br>(95% CI) | Risk difference <sup>1</sup><br>(95% CI) | Unadjusted HR<br>(95% CI)  | Adjusted HR <sup>2</sup><br>(95% CI)  |
|---------------------------------------------------------------------------------|---------------|----------------------------------------|------------------------------|------------------------------------------|----------------------------|---------------------------------------|
| <i>Myocardial infarction</i>                                                    |               |                                        |                              |                                          |                            |                                       |
| -CAD -DM (reference)                                                            | 398           | 0.24 (0.22-0.26)                       | 2.60% (2.35-2.86)            | reference                                | 1                          | 1                                     |
| -CAD +DM                                                                        | 62            | 0.27 (0.21-0.35)                       | 2.97% (2.30-3.76)            | 0.37 (-0.39-1.14)                        | 1.15 (0.88-1.50)           | 1.10 (0.84-1.44)                      |
| +CAD -DM                                                                        | 2,805         | 0.91 (0.88-0.95)                       | 9.47% (9.14-9.81)            | 6.87 (6.46-7.29)                         | 3.79 (3.41-4.21)           | 2.79 (2.48-3.14)                      |
| +CAD +DM                                                                        | 734           | 1.22 (1.13-1.31)                       | 12.32% (11.50-13.17)         | 9.72 (8.89-10.56)                        | 5.02 (4.44-5.67)           | 3.81 (3.33-4.36)                      |
| <i>Cardiac death</i>                                                            |               |                                        |                              |                                          |                            |                                       |
| -CAD -DM (reference)                                                            | 387           | 0.30 (0.27-0.33)                       | 2.85% (2.58-3.15)            | reference                                | 1                          | 1                                     |
| -CAD +DM                                                                        | 74            | 0.45 (0.36-0.57)                       | 4.05% (3.18-5.06)            | 1.20 (0.21-2.19)                         | 1.53 (1.19-1.96)           | 1.67 (1.30-2.14)                      |
| +CAD -DM                                                                        | 1,861         | 0.77 (0.73-0.80)                       | 7.12% (6.80-7.45)            | 4.27 (3.84-4.70)                         | 2.59 (2.32-2.89)           | 2.18 (1.93-2.48)                      |
| +CAD +DM                                                                        | 613           | 1.42 (1.31-1.54)                       | 11.65% (10.77-12.57)         | 8.80 (7.90-9.70)                         | 4.76 (4.19-5.41)           | 4.02 (3.48-4.64)                      |
| <i>All-cause death</i>                                                          |               |                                        |                              |                                          |                            |                                       |
| -CAD -DM (reference)                                                            | 3,164         | 2.42 (2.33-2.50)                       | 23.91% (23.16-24.69)         | reference                                | 1                          | 1                                     |
| -CAD +DM                                                                        | 627           | 3.83 (3.54-4.14)                       | 35.52% (33.17-37.99)         | 11.61 (9.08-14.14)                       | 1.60 (1.47-1.75)           | 1.73 (1.59-1.89)                      |
| +CAD -DM                                                                        | 8,275         | 3.42 (3.34-3.49)                       | 32.66% (32.05-33.27)         | 8.75 (7.77-9.73)                         | 1.42 (1.36-1.48)           | 1.25 (1.19-1.31)                      |
| +CAD +DM                                                                        | 2,485         | 5.75 (5.53-5.98)                       | 48.62% (47.13-50.14)         | 24.71 (23.20-26.22)                      | 2.42 (2.29-2.55)           | 2.08 (1.95-2.20)                      |
|                                                                                 |               |                                        |                              |                                          | Unadjusted IRR<br>(95% CI) | Adjusted IRR <sup>2</sup><br>(95% CI) |
| <i>Coronary revascularization &gt; 90 days after index coronary angiography</i> |               |                                        |                              |                                          |                            |                                       |
| -CAD -DM (reference)                                                            | 466           | 0.28 (0.26-0.31)                       | 3.04% (2.78-3.32)            | reference                                | 1                          | 1                                     |
| -CAD +DM                                                                        | 81            | 0.36 (0.29-0.45)                       | 3.88% (3.11-4.77)            | 0.84 (-0.03-1.71)                        | 1.28 (1.01-1.62)           | 1.16 (0.91-1.47)                      |
| +CAD -DM                                                                        | 5,360         | 1.88 (1.83-1.93)                       | 18.10% (17.66-18.54)         | 15.06 (14.55-15.57)                      | 6.69 (6.09-7.36)           | 6.29 (5.60-7.07)                      |
| +CAD +DM                                                                        | 1,199         | 2.13 (2.02-2.26)                       | 20.13% (19.12-21.16)         | 17.09 (16.07-18.11)                      | 7.60 (6.82-8.47)           | 7.07 (6.23-8.03)                      |

<sup>1</sup>Maximum follow-up of 11 years.

<sup>2</sup>Adjusted for age, hypertension, active smoking, previous ischemic stroke, peripheral artery disease, procedural priority, year of index coronary angiography, statin treatment, oral anticoagulant treatment, and antiplatelet treatment, using patients without CAD and without DM as reference. IRR was further adjusted for coronary revascularization < 90 days after the index coronary angiography.

Abbreviations: CAD, coronary artery disease; CI, confidence interval; CIP, cumulated incidence proportion; DM, diabetes mellitus; HR, hazard ratio; IRR, incidence rate ratio.

**Table S7. Number of events and risk of myocardial infarction, cardiac death, all-cause death, and coronary revascularization in female patients with and without diabetes stratified by coronary artery disease**

|                                                                                 | Events<br>(n) | Rate per 100 person-<br>years (95% CI) | CIP <sup>1</sup><br>(95% CI) | Risk difference <sup>1</sup><br>(95% CI) | Unadjusted HR<br>(95% CI)  | Adjusted HR <sup>2</sup><br>(95% CI)  |
|---------------------------------------------------------------------------------|---------------|----------------------------------------|------------------------------|------------------------------------------|----------------------------|---------------------------------------|
| <i>Myocardial infarction</i>                                                    |               |                                        |                              |                                          |                            |                                       |
| -CAD -DM (reference)                                                            | 397           | 0.23 (0.21-0.26)                       | 2.51% (2.28-2.77)            | reference                                | 1                          | 1                                     |
| -CAD +DM                                                                        | 66            | 0.31 (0.24-0.39)                       | 3.33% (2.61-4.19)            | 0.82 (0.00-1.64)                         | 1.33 (1.03-1.73)           | 1.33 (1.02-1.73)                      |
| +CAD -DM                                                                        | 1,152         | 0.87 (0.82-0.92)                       | 8.99% (8.50-9.49)            | 6.48 (5.94-7.02)                         | 3.71 (3.31-4.16)           | 2.63 (2.31-2.99)                      |
| +CAD +DM                                                                        | 321           | 1.21 (1.09-1.35)                       | 12.21% (11.00-13.50)         | 9.70 (8.45-10.95)                        | 5.15 (4.45-5.97)           | 3.72 (3.17-4.37)                      |
| <i>Cardiac death</i>                                                            |               |                                        |                              |                                          |                            |                                       |
| -CAD -DM (reference)                                                            | 302           | 0.22 (0.20-0.25)                       | 2.17% (1.94-2.44)            | reference                                | 1                          | 1                                     |
| -CAD +DM                                                                        | 52            | 0.32 (0.25-0.43)                       | 3.07% (2.29-4.02)            | 0.90 (0.00-1.79)                         | 1.47 (1.10-1.97)           | 1.63 (1.21-2.19)                      |
| +CAD -DM                                                                        | 907           | 0.91 (0.85-0.97)                       | 8.09% (7.58-8.62)            | 5.92 (5.33-6.51)                         | 4.11 (3.60-4.68)           | 2.55 (2.20-2.95)                      |
| +CAD +DM                                                                        | 259           | 1.37 (1.21-1.55)                       | 11.40% (10.09-12.81)         | 9.23 (7.87-10.59)                        | 6.20 (5.25-7.32)           | 4.14 (3.45-4.95)                      |
| <i>All-cause death</i>                                                          |               |                                        |                              |                                          |                            |                                       |
| -CAD -DM (reference)                                                            | 2,965         | 2.17 (2.09-2.25)                       | 21.72% (21.00-22.45)         | reference                                | 1                          | 1                                     |
| -CAD +DM                                                                        | 490           | 3.06 (2.80-3.34)                       | 29.58% (27.28-32.04)         | 7.86 (5.38-10.34)                        | 1.43 (1.30-1.57)           | 1.59 (1.45-1.76)                      |
| +CAD -DM                                                                        | 4,306         | 4.31 (4.18-4.44)                       | 39.77% (38.79-40.78)         | 18.05 (16.82-19.28)                      | 2.01 (1.92-2.11)           | 1.47 (1.39-1.55)                      |
| +CAD +DM                                                                        | 1,124         | 5.95 (5.62-6.31)                       | 50.30% (48.04-52.61)         | 28.58 (26.29-30.87)                      | 2.80 (2.62-3.00)           | 2.23 (2.07-2.40)                      |
|                                                                                 |               |                                        |                              |                                          | Unadjusted IRR<br>(95% CI) | Adjusted IRR <sup>2</sup><br>(95% CI) |
| <i>Coronary revascularization &gt; 90 days after index coronary angiography</i> |               |                                        |                              |                                          |                            |                                       |
| -CAD -DM (reference)                                                            | 264           | 0.15 (0.14-0.17)                       | 1.67% (1.48-1.88)            | reference                                | 1                          | 1                                     |
| -CAD +DM                                                                        | 55            | 0.26 (0.20-0.33)                       | 2.78% (2.12-3.57)            | 1.11 (0.36-1.86)                         | 1.67 (1.25-2.23)           | 1.59 (1.18-2.13)                      |
| +CAD -DM                                                                        | 1,669         | 1.31 (1.25-1.37)                       | 13.02% (12.45-13.61)         | 11.35 (10.74-11.96)                      | 8.52 (7.48-9.71)           | 6.48 (5.51-7.63)                      |
| +CAD +DM                                                                        | 436           | 1.72 (1.57-1.89)                       | 16.59% (15.20-18.04)         | 14.92 (13.49-16.35)                      | 11.24 (9.62-13.13)         | 8.28 (6.87-9.99)                      |

<sup>1</sup>Maximum follow-up of 11 years.

<sup>2</sup>Adjusted for age, hypertension, active smoking, previous ischemic stroke, peripheral artery disease, procedural priority, year of index coronary angiography, statin treatment, oral anticoagulant treatment, and antiplatelet treatment, using patients without CAD and without DM as reference. IRR was further adjusted for coronary revascularization < 90 days after the index coronary angiography.

Abbreviations: CAD, coronary artery disease; CI, confidence interval; CIP, cumulated incidence proportion; DM, diabetes mellitus; HR, hazard ratio; IRR, incidence rate ratio.
